# Supplementary material
Source: MDPI journal article supplement (https://www.mdpi.com/2673-4672/3/1/13)
Supplement: s1 [file s1]

# A Study of Real-Time and Satellite data during the Agriculture Crop Residue Burning on Atmospheric Pollutants at a Downwind Site of the Indo-Gangetic Plain

Neelam Baghel, Kirti Singh, Anita Lakhani, K. Maharaj Kumari and Aparna Satsangi\*

Department of Chemistry, Faculty of Science, Dayalbagh Educational Institute, Dayalbagh, Agra, 282005, India.

Corresponding author Email: [shivastava\\_aparna@yahoo.com](mailto:shivastava_aparna@yahoo.com)

Tel.: 91-562-2801545, Fax: 91-562-2801226

## Supplementary Document

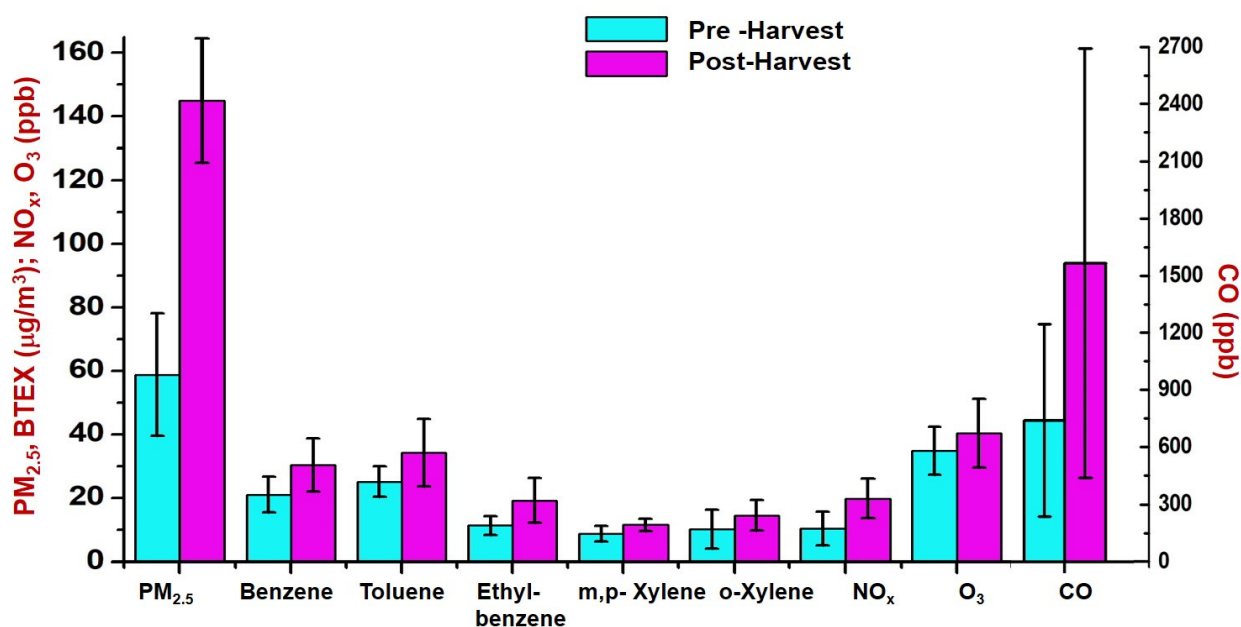

Figure S1. Average concentration of the pollutants during the pre-harvest and post-harvest period

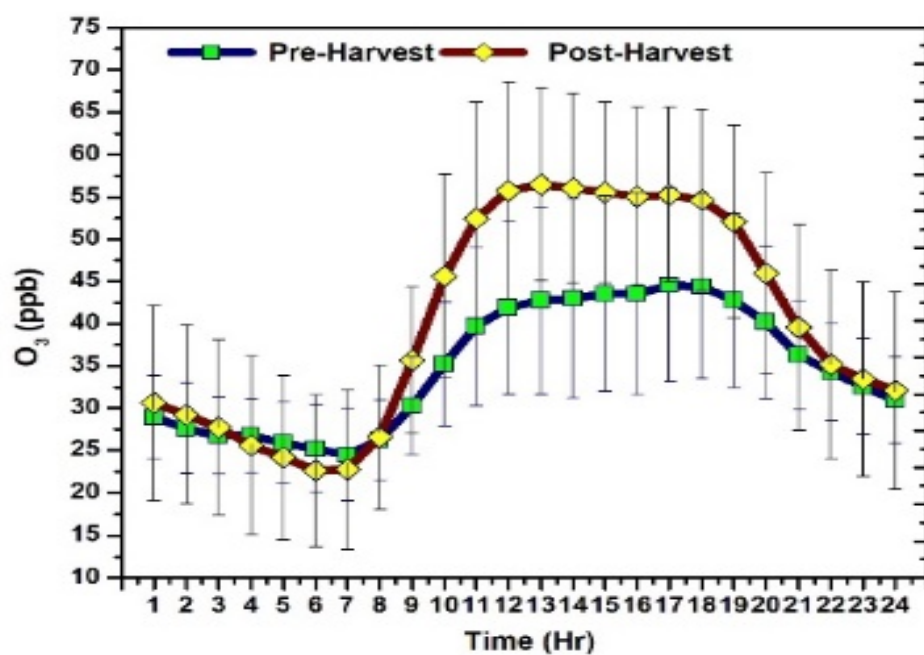

Figure S2. Diurnal pattern of O<sub>3</sub> during pre-harvest and post -harvest period

Table S1. Meteorological parameters (Temperature and Relative Humidity) during the pre-harvest and post-harvest period

|              | Temperature (°C) | Relative Humidity (%) |
|--------------|------------------|-----------------------|
| Pre-harvest  | 34.6 ± 4.1       | 66.2 ± 21.2           |
| Post-harvest | 30.1 ± 5.2       | 51.0 ± 19.5           |
